# Supplementary material for: IL-6 promotes the differentiation of a subset of naive CD8+ T cells into IL-21–producing B helper CD8+ T cells
Source: PubMed Central journal article supplement — J Exp Med. 2016 Oct 17;213(11):2281–91. doi: 10.1084/jem.20160417 (PMC5068236; doi:10.1084/jem.20160417), 2016-10-17
Supplement: JEM_20160417_sm.pdf [file JEM_20160417_sm.pdf]

SUPPLEMENTAL MATERIAL

Yang et al., <http://dx.doi.org/10.1084/jem.20160417>

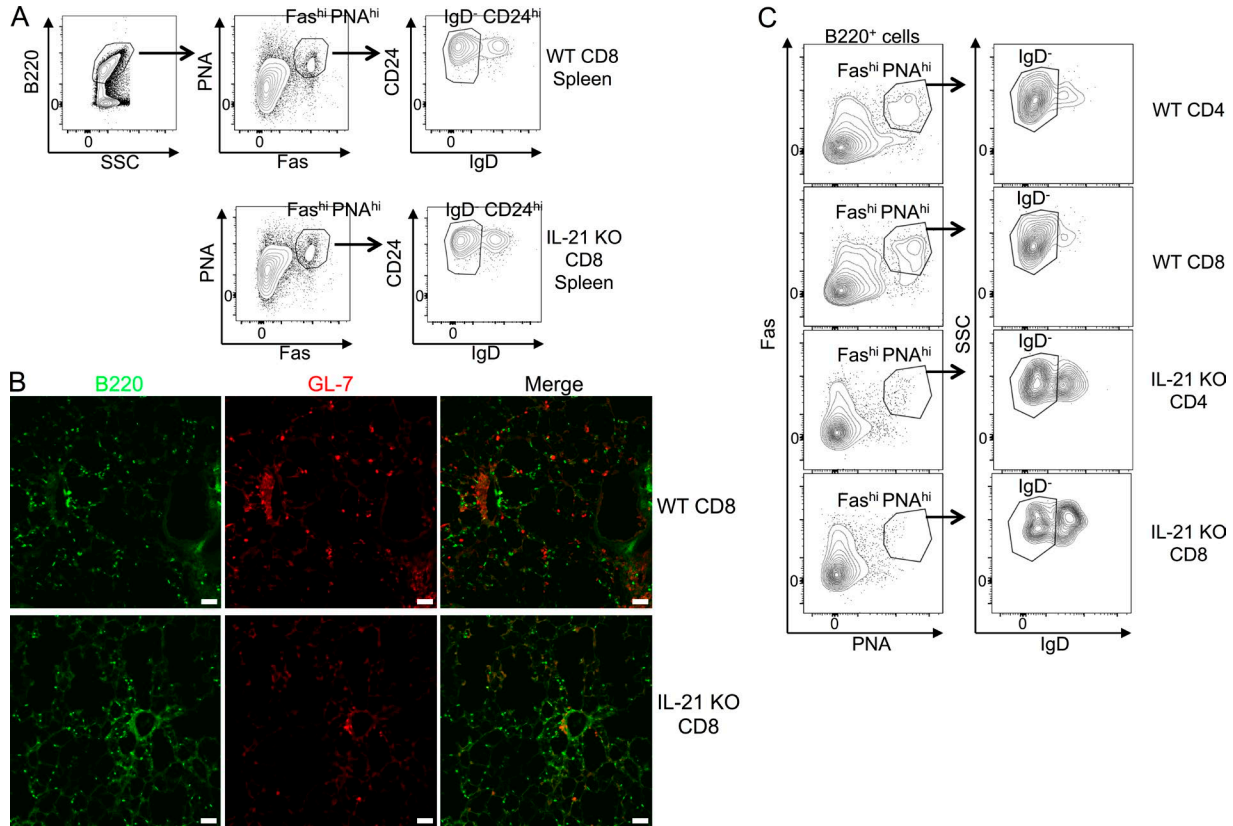

Figure S1. **Gating strategy for GC B cell staining in lungs and spleen and confocal image of GC B cell staining in lungs.** (A) WT or IL-21 KO CD8<sup>+</sup> T cells were transferred to IL-21 KO recipients, and these mice were subsequently infected with H1N1 PR8 virus i.n. ( $3 \times 10^3$  EIU). Splenocytes of infected IL-21 KO recipients that had received WT CD8<sup>+</sup> T (WT CD8) or IL-21 KO CD8<sup>+</sup> T (IL-21 KO CD8) were stained for B220, PNA, Fas, IgD, and CD24. Activated germinal center B cells were determined by B220<sup>+</sup>PNA<sup>hi</sup>Fas<sup>hi</sup>IgD<sup>-</sup>CD24<sup>hi</sup> using flow cytometry analysis. (B) Lungs slides from infected mice, as in A, were stained for B220 and GL-7. B220<sup>+</sup> cells and GL-7<sup>+</sup> cells were counted in infected IL-21 KO recipients that had received WT CD8<sup>+</sup> T cells (WT CD8) or IL-21 KO CD8<sup>+</sup> T cells (IL-21 KO CD8). Bars, 50  $\mu$ m. (C) IL-21 KO mice that had received WT CD8<sup>+</sup>, WT CD4<sup>+</sup>, IL-21 KO CD8<sup>+</sup>, and IL-21 KO CD4<sup>+</sup> T cells were infected with sublethal dose of influenza virus and 14 d later, and lung homogenates were stained for B220, PNA, Fas, and IgD. GC B cells were identified by gating in the B220<sup>+</sup> cells that are PNA<sup>hi</sup>Fas<sup>hi</sup>. Within this population, IgD<sup>-</sup> cells are the true GC B cells. SSC, side scatter.
